# Supplementary material
Source: ML conference proceedings conference paper supplement (https://proceedings.neurips.cc/paper_files/paper/2015/hash/82965d4ed8150294d4330ace00821d77-Abstract.html)
Supplement: Supplementary file [file 82965d4ed8150294d4330ace00821d77-Supplemental.zip]

# Supplement material for Mind the Gap: A Generative Approach to Interpretable Feature Selection and Extraction

Been Kim

Julie Shah

Finale Doshi–Velez

Massachusetts Institute of Technology,  
{beenkim, julie\_a\_shah}@csail.mit.edu

Harvard University  
finale@seas.harvard.edu

## Evidence Lower Bound (ELBO)

Minimizing the Kullback-Leibler divergence between the true posterior  $p(\theta|\{w_{nd}\})$  and the variational distribution  $q(\theta)$  corresponds to maximizing the lower bound on the evidence  $E_q[\log p(\theta|\{w_{nd}\})] - H(q)$  where  $H(q)$  is the entropy. We expand the terms in  $E_q[\log p(\theta|\{w_{nd}\})] - H(q)$  into

$$L(t, y, \beta, \pi, z) = E_q[\log p(\pi|\alpha)] \tag{1}$$

$$+ \sum^n E_q[\log p(z_n|\pi)] \tag{2}$$

$$+ \sum^n \sum^D E_q[\log p(w_{nd}|i_{ng}, f, l_d)] \tag{3}$$

$$+ \sum^n \sum^G E_q[\log p(i_{ng}|\beta, z_n)] \tag{4}$$

$$+ \sum^G \sum^K E_q[\log p(\beta_{gk}|t_{gk}, y_g)] \tag{5}$$

$$+ \sum^G \sum^K E_q[\log p(t_{gk}|\gamma_g)] \tag{6}$$

$$+ \sum^G E_q[\log p(\gamma_g|\sigma)] \tag{7}$$

$$+ \sum^G E_q[\log p(y_g|\rho)] \tag{8}$$

$$+ \sum^G E_q[\log p(f_g|\iota)] \tag{9}$$

$$+ \sum^D E_q[\log p(l_d|\kappa)] \tag{10}$$

$$- H(q) \tag{11}$$

and derive the value of each of the terms below.

**1st term**  $\pi$  are the cluster popularities.  $\Psi$  is the digamma function.

$$\begin{aligned} E_q[\log p(\pi|\alpha)] &= E_q[\log(\pi^{\alpha-1}) - \sum^K \log \Gamma(\alpha_i) + \log \Gamma(\sum^K \alpha_i)] \\ &= \sum^K (\alpha_i - 1) E_q[\log(\pi_k)] - \sum^K \log \Gamma(\alpha_i) + \log \Gamma(\sum^K \alpha_i) \\ &= \sum^K (\alpha_i - 1) (\Psi(\tau_k) - \Psi(\sum_j \tau_j)) - \sum^K \log \Gamma(\alpha_i) + \log \Gamma(\sum^K \alpha_i) \end{aligned}$$

**2nd term**  $z_n$  encodes the assignments of observations to clusters.

$$\begin{aligned}
E_q[\log p(z_n|\pi)] &= E_q\left[\sum_{k=1}^K \log(\pi_k^{1(z_n=k)})\right] \\
&= \sum_{k=1}^K E[\mathbf{1}(z_n = k)]E[\log \pi_k] \\
&= \sum_{k=1}^K \nu_{nk} * (\Psi(\tau_k) - \Psi(\sum_j \tau_j))
\end{aligned}$$

**3rd term** Likelihood.

$$\begin{aligned}
E_q[\log p(w_{nd}|i_{ng}, f, l_d)] &= E_q[\log(\prod_g \mathbf{1}(l_d = g)[(1)^{\mathbf{1}(f_g=1)\mathbf{1}(i_{ng}=1)\mathbf{1}(w_{nd}=1)}(\mathbf{0})^{\mathbf{1}(f_g=1)\mathbf{1}(i_{ng}=1)\mathbf{1}(w_{nd}=0)} \\
&\quad (\frac{1}{2})^{\mathbf{1}(f_g=0)\mathbf{1}(i_{ng}=1)}(\mathbf{0})^{\mathbf{1}(i_{ng}=0)\mathbf{1}(w_{nd}=1)}(1)^{\mathbf{1}(i_{ng}=0)\mathbf{1}(w_{nd}=0)} \\
&= \sum_g E_q[\mathbf{1}(l_d = g)\mathbf{1}(f_g = 1)\mathbf{1}(i_{ng} = 1)\mathbf{1}(w_{nd} = 1) \log(1) \\
&\quad + \mathbf{1}(l_d = g)\mathbf{1}(f_g = 1)\mathbf{1}(i_{ng} = 1)\mathbf{1}(w_{nd} = 0) \log(0) \\
&\quad + \mathbf{1}(l_d = g)\mathbf{1}(f_g = 0)\mathbf{1}(i_{ng} = 1) \log(\frac{1}{2}) \\
&\quad + \mathbf{1}(l_d = g)\mathbf{1}(i_{ng} = 0)\mathbf{1}(w_{nd} = 1) \log(\mathbf{0}) \\
&\quad + \mathbf{1}(l_d = g)\mathbf{1}(i_{ng} = 0)\mathbf{1}(w_{nd} = 0) \log(\mathbf{1})]
\end{aligned}$$

**4th term**  $i_{ng}$  indicates the presence of group  $g$  in observation  $n$ .

$$\begin{aligned}
E_q[\log p(i_{ng}|\beta, z_n)] &= E_q[\log(\beta_{gz_n}^{i_{ng}}(1 - \beta_{gz_n})^{1-i_{ng}})] \\
&= i_{ng}E_q[\log \beta_{gz_n}] + (1 - i_{ng})E_q[\log(1 - \beta_{gz_n})] \\
&= i_{ng}E_q[\sum_{k=1}^K \mathbf{1}(z_n = k) \log \beta_{gk}] + (1 - i_{ng})E_q[\sum_{k=1}^K \mathbf{1}(z_n = k) \log(1 - \beta_{gk})] \\
&= i_{ng} \sum_{k=1}^K E_q[\nu_{nk} \log \beta_{gk}] + (1 - i_{ng}) \sum_{k=1}^K E_q[\nu_{nk} \log(1 - \beta_{gk})] \\
&= o_{ng} \sum_{k=1}^K \nu_{nk}(\Psi(\phi_{gk1}) - \Psi(\phi_{gk1} + \phi_{gk2})) + (1 - o_{ng}) \sum_{k=1}^K \nu_{nk}(\Psi(\phi_{gk2}) - \Psi(\phi_{gk1} + \phi_{gk2}))
\end{aligned}$$

**5th term:**  $\beta_{gk}$  is the probability of each group for each cluster.

$$\begin{aligned}
E_q[\log p(\beta_{gk}|t_{gk}, y_g)] &= E_q[\log(\left(\text{Beta}(\alpha_t, \beta_t)^{t_{gk}} \text{Beta}(\alpha_b, \beta_b)^{(1-t_{gk})}\right)^{y_g} \text{Beta}(\alpha_u, \beta_u)^{1-y_g})] \\
&= E_q[y_g t_{gk} \log \text{Beta}(\alpha_t, \beta_t) + y_g(1-t_{gk}) \log \text{Beta}(\alpha_b, \beta_b) + (1-y_g) \log \text{Beta}(\alpha_u, \beta_u)] \\
&= E_q[y_g t_{gk} \{(\alpha_t - 1) \log(\beta_{gk}) + (\beta_t - 1) \log(1 - \beta_{gk}) - \log \text{BetaFun}(\alpha_t, \beta_t)\} \\
&\quad + y_g(1-t_{gk}) \{(\alpha_b - 1) \log(\beta_{gk}) + (\beta_b - 1) \log(1 - \beta_{gk}) - \log \text{BetaFun}(\alpha_b, \beta_b)\} \\
&\quad + (1-y_g) \{(\alpha_u - 1) \log(\beta_{gk}) + (\beta_u - 1) \log(1 - \beta_{gk}) - \log \text{BetaFun}(\alpha_u, \beta_u)\}] \\
&= E[y_g] E[t_{gk}] \{(\alpha_t - 1) E[\log(\beta_{gk})] + (\beta_t - 1) E[\log(1 - \beta_{gk})] - \log \text{BetaFun}(\alpha_t, \beta_t)\} \\
&\quad + E[y_g] (1 - E[t_{gk}]) \{(\alpha_b - 1) E[\log(\beta_{gk})] + (\beta_b - 1) E[\log(1 - \beta_{gk})] - \log \text{BetaFun}(\alpha_b, \beta_b)\} \\
&\quad + (1 - E[y_g]) \{(\alpha_u - 1) E[\log(\beta_{gk})] + (\beta_u - 1) E[\log(1 - \beta_{gk})] - \log \text{BetaFun}(\alpha_u, \beta_u)\} \\
&= E[\log(\beta_{gk})] (E[y_g] E[t_{gk}] (\alpha_t - 1) + E[y_g] (1 - E[t_{gk}]) (\alpha_b - 1) + (1 - E[y_g]) (\alpha_u - 1)) \\
&\quad + E[\log(1 - \beta_{gk})] (E[y_g] E[t_{gk}] (\beta_t - 1) + E[y_g] (1 - E[t_{gk}]) (\beta_b - 1) + (1 - E[y_g]) (\beta_u - 1)) \\
&\quad - E[y_g] E[t_{gk}] \log \text{BetaFun}(\alpha_t, \beta_t) \\
&\quad - E[y_g] (1 - E[t_{gk}]) \log \text{BetaFun}(\alpha_b, \beta_b) \\
&\quad - (1 - E[y_g]) \log \text{BetaFun}(\alpha_u, \beta_u) \\
&= (\Psi(\phi_{gk1}) - \Psi(\phi_{gk1} + \phi_{gk2})) (\eta_g \lambda_{gk} (\alpha_t - 1) + \eta_g (1 - \lambda_{gk}) (\alpha_b - 1) + (1 - \eta_g) (\alpha_u - 1)) \\
&\quad + (\Psi(\phi_{gk2}) - \Psi(\phi_{gk1} + \phi_{gk2})) (\eta_g \lambda_{gk} (\beta_t - 1) + \eta_g (1 - \lambda_{gk}) (\beta_b - 1) + (1 - \eta_g) (\beta_u - 1)) \\
&\quad - \eta_g \lambda_{gk} \log \text{BetaFun}(\alpha_t, \beta_t) \\
&\quad - \eta_g (1 - \lambda_{gk}) \log \text{BetaFun}(\alpha_b, \beta_b) \\
&\quad - (1 - \eta_g) \log \text{BetaFun}(\alpha_u, \beta_u)
\end{aligned}$$

**6th term:**  $t_g$  is the auxiliary variable indicating from which mode an important  $\beta_{gk}$  was drawn.

$$\begin{aligned}
E_q[\log p(t_{gk}|\gamma_g)] &= E_q[\log(\gamma_g^{t_{gk}} (1 - \gamma_g)^{1-t_{gk}})] \\
&= E[t_{gk}] E[\log \gamma_g] + (1 - E[t_{gk}]) E[\log(1 - \gamma_g)] \\
&= \lambda_{gk} (\Psi(\ell_{g1}) - \Psi(\ell_{g1} + \ell_{g2})) + (1 - \lambda_{gk}) (\Psi(\ell_{g2}) - \Psi(\ell_{g1} + \ell_{g2}))
\end{aligned}$$

**7th term:**  $\gamma_g$  is the proportion of each mode in multimodal distribution.

$$\begin{aligned}
E_q[\log p(\gamma_g|\sigma)] &= E_q[\log p(\gamma_g|\sigma)] \\
&= E_q[\log\left(\frac{\gamma_g^{\sigma_1-1} (1 - \gamma_g)^{\sigma_2-1}}{\text{BetaFun}(\sigma_1, \sigma_2)}\right)] \\
&= E_q[\log\left(\frac{\gamma_g^{\sigma_1-1} (1 - \gamma_g)^{\sigma_2-1}}{\text{BetaFun}(\sigma_1, \sigma_2)}\right)] + \text{Const} \\
&= ((\sigma_1 - 1) E[\log \gamma_g] + (\sigma_2 - 1) E[\log(1 - \gamma_g)] - \log \text{BetaFun}(\sigma_1, \sigma_2)) \\
&= [(\sigma_1 - 1) (\Psi(\ell_{g1}) - \Psi(\ell_{g1} + \ell_{g2})) \\
&\quad + (\sigma_2 - 1) (\Psi(\ell_{g2}) - \Psi(\ell_{g1} + \ell_{g2})) \\
&\quad - \log \text{BetaFun}(\sigma_1, \sigma_2)]
\end{aligned}$$

**8th term:**  $y_g$  indicates whether a dimension is important.

$$\begin{aligned}
E_q[\log p(y_g)] &= E_q[\log \rho^{y_g} (1 - \rho)^{1-y_g}] \\
&= E[y_g] \log \rho + (1 - E[y_g]) \log(1 - \rho) \\
&= \eta_g \log \rho + (1 - \eta_g) \log(1 - \rho)
\end{aligned}$$

**9th term:**  $f_g$  indicates which formula is associated with group  $g$ .

$$\begin{aligned}
E_q[\log p(f_g|\iota)] &= E_q[\log \iota^{f_g} (1 - \iota)^{1-f_g}] \\
&= E[f_g] \log \iota + (1 - E[f_g]) \log(1 - \iota) \\
&= e_g \log \iota + (1 - e_g) \log(1 - \iota)
\end{aligned}$$

**10th term:**  $l_d$  indicates to which group dimension  $d$  belongs.

$$\begin{aligned} E_q[\log p(l_d|\kappa)] &= E_q[\sum_{g=1}^G \log(\kappa_g^{1(l_d=g)})] \\ &= \sum_{g=1}^G E[\mathbf{1}(l_d = g)] E[\log \kappa_g] \\ &= \sum_{g=1}^G c_{dg} * (\Psi(h_g) - \Psi(\sum_{g=1}^G h_g)) \end{aligned}$$

**11th term:** Entropy term.

$$\begin{aligned}
H(q) &= E_q[\log(q(t)q(y)q(\pi)q(\beta)q(z)q(\gamma)q(i)q(l)q(\theta))] \\
&= E_q\left[\sum_g^G \sum_k^K \log q(t_{gk}) + \sum_g^G \log q(y_g) + \log q(\pi) \right. \\
&\quad \left. + \sum_g^G \sum_k^K \log q(\beta_{gk}) + \sum_n^N \sum_k^K \log q(z_{nk}) + \sum_g^G \log q(\gamma_g) + \sum_n^N \sum_g^G \log q(i_{ng}) + \sum_g^G \log q(\theta_g) + \log p(\kappa)\right] \\
&= \sum_g^G \sum_k^K E_q[t_{gk}] \log \lambda_{gk} + (1 - E_q[t_{gk}]) \log(1 - \lambda_{gk}) \\
&\quad + \sum_g^G E_q[y_g] \log(\eta_g) + (1 - E_q[y_g]) \log(1 - \eta_g) \\
&\quad + \sum_k^K (\tau_k - 1) E_q[\log(\pi_k)] - \sum_k^K \log \Gamma(\tau_k) + \log \Gamma\left(\sum_k^K \tau_k\right) \\
&\quad + \sum_g^G \sum_k^K ((\phi_{gk1} - 1)E[\log(\beta_{gk})] + (\phi_{gk2} - 1)E[\log(1 - \beta_{gk})] - \log \text{BetaFun}(\phi_{gk1}, \phi_{gk2})) \\
&\quad + \sum_n^N \sum_k^K \nu_{nk} \log v_{nk} \\
&\quad + \sum_g^G (\ell_{g1} - 1)E[\log(\gamma_g)] + (\ell_{g2} - 1)E[\log(1 - \gamma_g)] - \log \text{BetaFun}(\ell_{g1}, \ell_{g2}) \\
&\quad + \sum_n^N \sum_g^G E_q[i_{ng}] \log(o_{ng}) + (1 - E_q[i_{ng}]) \log(1 - o_{ng}) \\
&\quad + \sum_D^D \sum_g^G c_{dg} \log c_{dg} \\
&\quad + \sum_g^G E_q[f_g] \log(e_g) + (1 - E_q[f_g]) \log(1 - e_g) \\
&= \sum_g^G \sum_k^K \lambda_{gk} \log \lambda_{gk} + (1 - \lambda_{gk}) \log(1 - \lambda_{gk}) \\
&\quad + \sum_g^G \eta_g \log(\eta_g) + (1 - \eta_g) \log(1 - \eta_g) \\
&\quad + \sum_k^K (\tau_k - 1)(\Psi(\tau_k) - \Psi\left(\sum_j^K \tau_j\right)) - \sum_k^K \log \Gamma(\tau_k) + \log \Gamma\left(\sum_k^K \tau_k\right) \\
&\quad + \sum_g^G \sum_k^K ((\phi_{gk1} - 1)(\Psi(\phi_{gk1}) - \Psi(\phi_{gk1} + \phi_{gk2})) + (\phi_{gk2} - 1)(\Psi(\phi_{gk2}) - \Psi(\phi_{gk1} + \phi_{gk2})) - \log \text{BetaFun}(\phi_{gk1}, \phi_{gk2})) \\
&\quad + \sum_n^N \sum_k^K \nu_{nk} \log v_{nk} \\
&\quad + \sum_g^G (\ell_{g1} - 1)(\Psi(\ell_{g1}) - \Psi(\ell_{g1} + \ell_{g2})) + (\ell_{g2} - 1)(\Psi(\ell_{g2}) - \Psi(\ell_{g1} + \ell_{g2})) - \log \text{BetaFun}(\ell_{g1}, \ell_{g2}) \\
&\quad + \sum_n^N \sum_g^G o_{ng} \log(o_{ng}) + (1 - o_{ng}) \log(1 - o_{ng}) \\
&\quad + \sum_D^D \sum_g^G c_{dg} \log c_{dg} \\
&\quad + \sum_g^G e \log(e_g) + (1 - e_g) \log(1 - e_g)
\end{aligned}$$
